# Supplementary material for: Antagonistic actions of two human Pan3 isoforms on global mRNA turnover
Source: PubMed Central journal article supplement — RNA. 2017 Sep;23(9):1404–18. doi: 10.1261/rna.061556.117 (PMC5558910; doi:10.1261/rna.061556.117), 2017-09
Supplement: supp_061556.117_Supplemental_Table_S1.pdf [file supp_061556.117_Supplemental_Table_S1.pdf]

**Supplemental Table 1: Summary of the RNA-Sequencing results**

| <b>Experiment</b> | <b>Time point (h)</b> | <b>Mapped reads</b> |
|-------------------|-----------------------|---------------------|
| Control knockdown | 0                     | 45,116,609          |
|                   | 0.5                   | 41,424,556          |
|                   | 1                     | 40,703,019          |
|                   | 2                     | 40,488,035          |
|                   | 4                     | 38,135,772          |
|                   | 6                     | 39,669,279          |
|                   | Pan3L knockdown       | 0                   |
| 0.5               |                       | 42,139,373          |
| 1                 |                       | 42,4371,99          |
| 2                 |                       | 40,261,065          |
| 4                 |                       | 42,776,696          |
| 6                 |                       | 41,391,161          |
| Pan3S knockdown   |                       | 0                   |
|                   | 0.5                   | 40,102,107          |
|                   | 1                     | 41,210,733          |
|                   | 2                     | 43,937,473          |
|                   | 4                     | 39,528,665          |
|                   | 6                     | 38,739,952          |
|                   | Pan3L+S knockdwon     | 0                   |
| 0.5               |                       | 40,902,148          |
| 1                 |                       | 41,810,047          |
| 2                 |                       | 41,079,386          |
| 4                 |                       | 38,643,736          |
| 6                 |                       | 40,979,523          |
